# Supplementary material for: Prioritizing the scale-up of interventions for malaria control and elimination
Source: PubMed Central journal article supplement (PMC6454681; doi:10.1186/s12936-019-2755-5), 2019-04-08

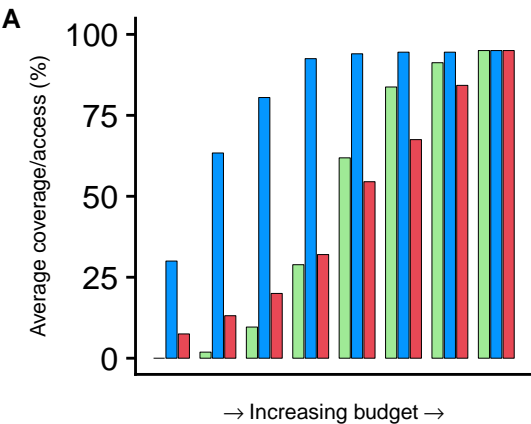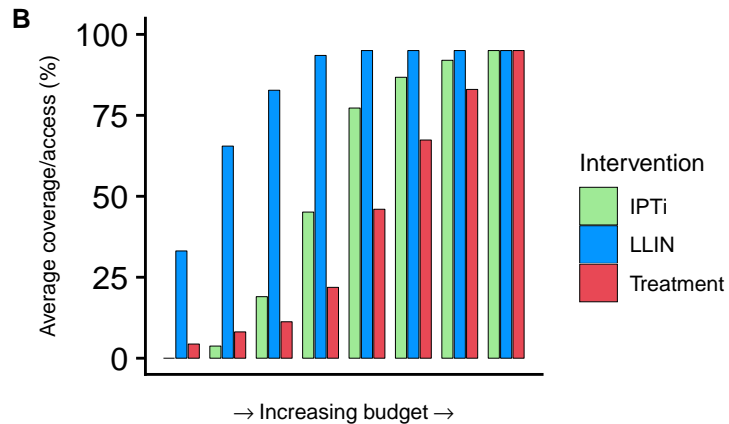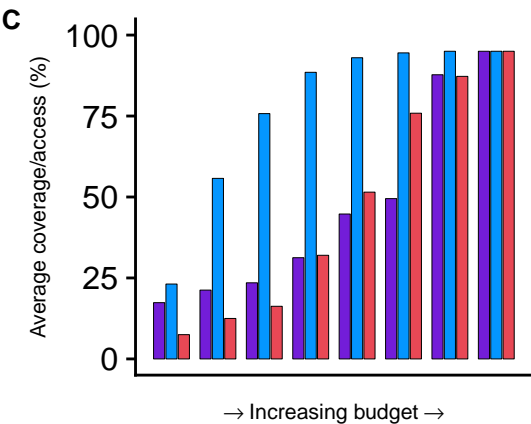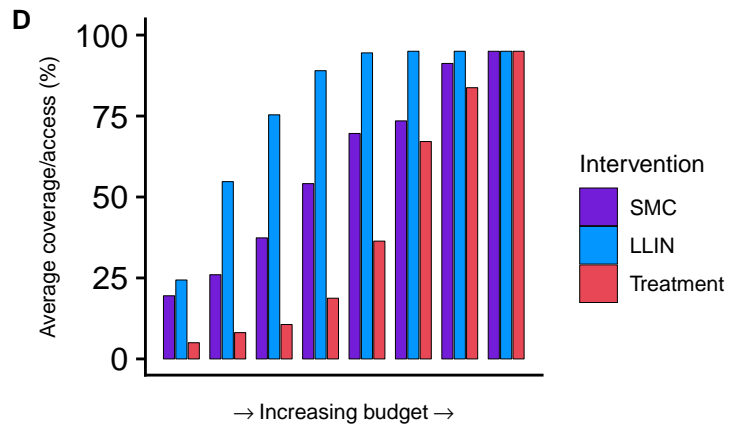

Supplement: 12936_2019_2755_MOESM4_ESM.pdf [file 12936_2019_2755_MOESM4_ESM.pdf]
