# Supplementary material for: Prioritizing the scale-up of interventions for malaria control and elimination
Source: Springer Nature journal article supplement (doi:10.1186/s12936-019-2755-5), 2019-04-08

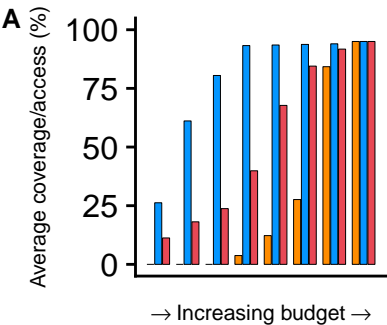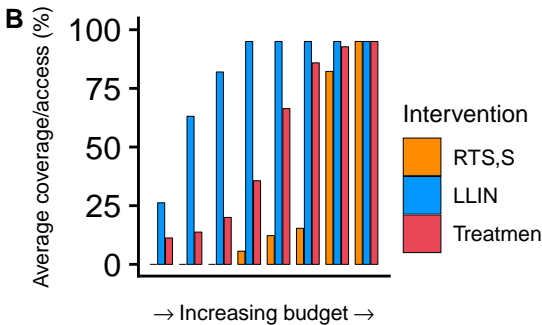

Supplement: MOESM8 [file 16629800]
